# Supplementary material for: Long non-coding RNA OIP5-AS1 aggravates acute lung injury through promoting inflammation and cell apoptosis via regulating miR-26a-5p/TLR4 axis
Source: Research Square preprint supplement (doi:10.21203/rs.3.rs-228408/v1), 2021-03-03
Supplement: Supplementary file 1 [file 84d4d1d11441f8cf33f99fb2.xls]

miRNAid	miRNAname	geneID	geneName	geneType
MIMAT0000082	hsa-miR-26a-5p	ENSG00000272084	AL137127.1	3prime_overlapping_ncRNA
MIMAT0000082	hsa-miR-26a-5p	ENSG00000273026	AL358472.3	antisense
MIMAT0000082	hsa-miR-26a-5p	ENSG00000234741	GAS5	processed_transcript
MIMAT0000082	hsa-miR-26a-5p	ENSG00000206573	THUMPD3-AS1	antisense
MIMAT0000082	hsa-miR-26a-5p	ENSG00000245060	LINC00847	lincRNA
MIMAT0000082	hsa-miR-26a-5p	ENSG00000228223	HCG11	lincRNA
MIMAT0000082	hsa-miR-26a-5p	ENSG00000224843	LINC00240	lincRNA
MIMAT0000082	hsa-miR-26a-5p	ENSG00000203875	SNHG5	processed_transcript
MIMAT0000082	hsa-miR-26a-5p	ENSG00000226816	AC005082.1	lincRNA
MIMAT0000082	hsa-miR-26a-5p	ENSG00000243107	AC000120.1	sense_overlapping
MIMAT0000082	hsa-miR-26a-5p	ENSG00000245910	SNHG6	processed_transcript
MIMAT0000082	hsa-miR-26a-5p	ENSG00000269821	KCNQ1OT1	antisense
MIMAT0000082	hsa-miR-26a-5p	ENSG00000245532	NEAT1	lincRNA
MIMAT0000082	hsa-miR-26a-5p	ENSG00000251562	MALAT1	lincRNA
MIMAT0000082	hsa-miR-26a-5p	ENSG00000251562	MALAT1	lincRNA
MIMAT0000082	hsa-miR-26a-5p	ENSG00000279742	AP000974.1	TEC
MIMAT0000082	hsa-miR-26a-5p	ENSG00000258210	AC144548.1	processed_transcript
MIMAT0000082	hsa-miR-26a-5p	ENSG00000235423	AC068768.1	antisense
MIMAT0000082	hsa-miR-26a-5p	ENSG00000258824	AL122035.1	antisense
MIMAT0000082	hsa-miR-26a-5p	ENSG00000247556	OIP5-AS1	processed_transcript
MIMAT0000082	hsa-miR-26a-5p	ENSG00000103472	RRN3P2	processed_transcript
MIMAT0000082	hsa-miR-26a-5p	ENSG00000264772	AC016876.2	processed_transcript
MIMAT0000082	hsa-miR-26a-5p	ENSG00000215769	ARHGAP27P1-BPTFP1-KPNA2P3	processed_transcript
MIMAT0000082	hsa-miR-26a-5p	ENSG00000268205	AC005261.1	lincRNA
MIMAT0000082	hsa-miR-26a-5p	ENSG00000260032	NORAD	lincRNA
MIMAT0000082	hsa-miR-26a-5p	ENSG00000223768	LINC00205	bidirectional_promoter_lncRNA
MIMAT0000082	hsa-miR-26a-5p	ENSG00000093100	AC016026.1	processed_transcript
MIMAT0000082	hsa-miR-26a-5p	ENSG00000253352	TUG1	bidirectional_promoter_lncRNA
MIMAT0000082	hsa-miR-26a-5p	ENSG00000253352	TUG1	bidirectional_promoter_lncRNA
MIMAT0000082	hsa-miR-26a-5p	ENSG00000261409	AL035425.3	sense_overlapping
